# Supplementary material for: HIIT is not superior to MICT in altering blood lipids: a systematic review and meta-analysis
Source: PubMed Central journal article supplement — BMJ Open Sport Exerc Med. 2019 Dec 17;5(1):e000647. doi: 10.1136/bmjsem-2019-000647 (PMC6937112; doi:10.1136/bmjsem-2019-000647), 2019-12-17

## Supplementary Files

**HIIT is not superior to MICT in changing blood lipids: A systematic review and meta-analyses.**

Gina N Wood<sup>1\*</sup>, Anna Murrell<sup>2</sup>, Neil A Smart<sup>1</sup>, Tom van der Touw<sup>1</sup>

\* Corresponding author at:

School of Science and Technology,

University of New England, Armidale, NSW 2351, Australia

Email: gwood26@myune.edu.au

G.N. Wood is supported by an Australian Government Research Training Program (RTP) Scholarship. This work received no other financial support and has no relationship to industry.

The authors report no relationships that could be construed as a conflict of interest. The authors take responsibility for all aspects of the reliability and freedom from bias of the data presented and their discussed interpretation.

---

<sup>1</sup> School of Science and Technology in the Faculty of Science, Agriculture, Business and Law, University of New England, Armidale, NSW, Australia 2351.

<sup>2</sup> School of Rural Medicine in the Faculty of Medicine and Health, University of New England, Armidale, NSW, Australia 2351.

Table [1] Study and PICO (full)

| Study (alphabetical order)      | Participants (number, gender, age, health status, dropout)                                                                                                                                                                                                                                           | Exercise Protocols (frequency, intensity, time, type, volume, progression, study duration, exercise equipment, session supervision, physiological monitoring; work or energy matching)                                                                                                                                                                                                                                                                                                                                                                                                                             | Pre- and Post Lipid Outcomes                                                                                                                                                                                                                                                                                                                                                                             |
|---------------------------------|------------------------------------------------------------------------------------------------------------------------------------------------------------------------------------------------------------------------------------------------------------------------------------------------------|--------------------------------------------------------------------------------------------------------------------------------------------------------------------------------------------------------------------------------------------------------------------------------------------------------------------------------------------------------------------------------------------------------------------------------------------------------------------------------------------------------------------------------------------------------------------------------------------------------------------|----------------------------------------------------------------------------------------------------------------------------------------------------------------------------------------------------------------------------------------------------------------------------------------------------------------------------------------------------------------------------------------------------------|
| (Ciolac, et al. 2010)           | Recruited (R) 44 ♀;<br>Analysed (A) HIIT: 11, MICT: 11, CON: 12;<br>HIIT: 24.4 ± 3.8 years<br>MICT: 26.6 ± 4.9 years<br>CON: 25.3 ± 3.7 years;<br>Status: healthy;<br>HIIT dropout: 5 (1 non compliant)<br>MICT dropout: 5 (2 non compliant)<br>CON dropout: 0<br>Completion compliance minimum: 70% | Treadmill walking or running;<br>3 sessions per week;<br>16 weeks duration;<br>Weight-bearing;<br>5 min warm-up (intensity unspecified);<br>15 min calisthenics cool down (intensity unspecified);<br>HIIT: (2 min walking 50–60% of VO <sub>2MAX</sub> + 1 min walking/running at 80–90% of VO <sub>2MAX</sub> ) x 13;<br>MICT: 40 min walking 60–70% VO <sub>2MAX</sub> ;<br>Cardiovascular workload matched;<br>Exercise time matched;<br>Supervised;<br>HR monitoring device;<br>VO <sub>2MAX</sub> established at baseline; treadmill incline adjusted throughout duration of study for training adaptations; | Measurements taken during follicular phase of subject's cycle, pre-post intervention;<br>12-hour fasted state,<br>seated position;<br>mg dL <sup>-1</sup><br>Lipid fractions similar between groups at baseline and follow-up;<br>Lipid changes:<br>TC: ↓HIIT>↓MICT;<br>TRG: ↓HIIT>↑MICT;<br>HDL-C: ↑MICT>↑HIIT;<br>LDL-C: ↓HIIT>↓MICT;<br>not statistically significant;                                |
| (Connolly, et al. 2017)         | R 48 ♀;<br>A HIIT: 15, MICT: 15, CON: 15<br>HIIT: 44 ± 7 years<br>MICT: 43 ± 7 years<br>CON: 45 ± 7 years;<br>Status: healthy;<br>HIIT dropout: 1<br>MICT dropout: 1<br>CON dropout: 1                                                                                                               | Ergocycle;<br>3 sessions per week;<br>12 weeks duration;<br>Non weight-bearing;<br>5 min warm-up 50W;<br>5 min cool-down 50W;<br>HIIT: (30-20-10 sec) ie: 30 sec LI (~30% of max effort) + 20 sec MI (~50–60% of max effort) + 10 sec HI (>90% max effort) x 5 + 2 min passive recovery) x 5;<br>MICT: 50 min 70-85% HR <sub>peak</sub> ;<br>Not work/energy matched;<br>Supervised;<br>HR monitoring device, RPE 10 point scale; self-selection of intensity (pedal cadence or flywheel resistance increase) and self-adjustment for training adaptation;                                                         | Time of measurement pre intervention not indicated; post not < 96 hours after final exercise session;<br>Overnight fasted state,<br>seated position;<br>mmol/L<br>Lipid fractions similar between groups at baseline and follow-up;<br>Lipid changes:<br>TC: ↓MICT>↑HIIT;<br>TRG: ↑MICT=↑HIIT;<br>HDL-C: ↓HIIT<↓MICT;<br>LDL-C: ↓MICT>↑HIIT;<br>TC/HDL-C: ↑MICT<↑HIIT;<br>not statistically significant; |
| (Cuddy, Ramos and Dalleck 2019) | R: 16 ♀, 16 ♂<br>A HIIT: 12, MICT: 15,<br>HIIT: 40.8 ± 10.8 years<br>MICT: 42.2 ± 9.7 years<br>Status: Ov, Ob<br>HIIT dropout: 4<br>MICT dropout: 1                                                                                                                                                  | Ergocycle<br>HIIT: 2-3-4 sessions per week;<br>MICT: 3-4-5 sessions per week<br>8 weeks duration;<br>Non-weight bearing;<br>HIIT: 3 min warm-up, 3 min cool-down<br>MICT: unspecified (included in 30 mins)                                                                                                                                                                                                                                                                                                                                                                                                        | Measurements taken pre-post training (48-72 hours after last training session);<br>Fasted state;<br>Seated position;<br>mg dL <sup>-1</sup><br>Lipid fractions similar between groups at baseline;<br>Lipid changes:<br>TRG: ↓HIIT>↓MICT;                                                                                                                                                                |

|                       |                                                                                                                                                                                                                                                |                                                                                                                                                                                                                                                                                                                                                                                                                                                                                                                                                                                                                                         |                                                                                                                                                                                                                                                                                                                                                                                                                                           |
|-----------------------|------------------------------------------------------------------------------------------------------------------------------------------------------------------------------------------------------------------------------------------------|-----------------------------------------------------------------------------------------------------------------------------------------------------------------------------------------------------------------------------------------------------------------------------------------------------------------------------------------------------------------------------------------------------------------------------------------------------------------------------------------------------------------------------------------------------------------------------------------------------------------------------------------|-------------------------------------------------------------------------------------------------------------------------------------------------------------------------------------------------------------------------------------------------------------------------------------------------------------------------------------------------------------------------------------------------------------------------------------------|
|                       |                                                                                                                                                                                                                                                | <p>HIIT:<br/>Wk 1-2: 20 sec sprint + 3 min slow recovery + 20 secs sprint = 4 mins of HIIT protocol per session<br/>2 days<br/>Wk 3-4: as above 3 days<br/>Wk 5-8: as above 4 days<br/>MICT (unspecified aerobic exercise):<br/>Wk 1: 40-50% HRR 3 days 25min<br/>Wk 2: 50-55% HRR 4 days 30 min<br/>Wk 3-4: 55-60% HRR 4 days 30 min<br/>Wk 5-6: 55-60% HRR 5 days 30 min<br/>Wk 7-8: 60-65% HRR 5 days 30 min<br/>HRR;<br/>Exercise energy expenditure unmatched;<br/>Supervised;<br/>MHR and VO<sub>2</sub>MAX estimated at baseline; HIIT intensity adjusted, MICT not stated;<br/>HIIT: HR monitoring device, MICT not stated;</p> | <p>HDL-C: ↑HIIT&gt;↑MICT;<br/>Statistically significant within group from baseline for HIIT and MICT but not between groups;</p>                                                                                                                                                                                                                                                                                                          |
| (Fisher, et al. 2015) | <p>R 28♂;<br/>A HIIT: 13, MICT: 10;<br/>20 ± 1.5 years;<br/>Status: Ov, Ob;<br/>HIIT dropout: 2<br/>MICT dropout: 3;</p>                                                                                                                       | <p>Ergocycle;<br/>HIIT: 3 sessions per week;<br/>MICT: 5 sessions per week;<br/>6 weeks duration;<br/>Non weight-bearing;<br/>Warm-up/cool-down not indicated;<br/>HIIT: (((4 min 15% Max-AP + 30 sec 85% Max-AP) x 4) + 2 min 15% Max-AP) x 2;<br/>MICT: 45-60 min 55-65% VO<sub>2</sub>peak;<br/>Exercise energy expenditure match not indicated;<br/>Supervised;<br/>HR monitoring device;<br/>Maximum Anaerobic Power (Max A-P) and VO<sub>2</sub>peak established at baseline; adjustment of effort during sessions not indicated;</p>                                                                                             | <p>Measurements taken 24-72 hours after last day of training;<br/>Overnight fasted state;<br/>Seated position;<br/>mg dL<sup>-1</sup><br/>Lipid fractions similar between groups at baseline;<br/>Lipid changes:<br/>TC*: ↓MICT&gt;↓HIIT;<br/>TRG*: ↓MICT&gt;↓HIIT;<br/>*Statistically significant for test of change over time within groups;<br/>HDL-C: ↓HIIT&lt;↓MICT;<br/>LDL-C: ↓MICT&gt;↓HIIT<br/>Not statistically significant</p> |
| (Hwang, et al. 2016)  | <p>R 51;<br/>A HIIT: 15(5♂), MICT: 14(7♂), CON: 14(5♂);<br/>HIIT: 64.8 ± 1.4 years<br/>MICT: 65.6 ± 1.8 years<br/>CON: 63.8 ± 1.6 years;<br/>Aged;<br/>Status: Ov;<br/>HIIT dropout: 2(1♂)<br/>MICT dropout: 4(2♂)<br/>CON dropout: 2(1♂);</p> | <p>All-extremity ergometer;<br/>4 sessions per week;<br/>8 weeks duration;<br/>Non weight-bearing;<br/>10 min warm-up 70% HR<sub>peak</sub>;<br/>2-min cool-down 70% HR<sub>peak</sub>;<br/>HIIT: (4 min 90% HR<sub>peak</sub> + 3 min 70% HR<sub>peak</sub>) x 4;<br/>MICT: 32 min 70% HR<sub>peak</sub><br/>Exercise energy expenditure closely matched;<br/>Supervised;<br/>HR monitoring device;</p>                                                                                                                                                                                                                                | <p>Measurements taken pre intervention. Post intervention blood samples obtained 31.8 ± 6.1 and 24.7 ± 3.9 hours following last exercise training session for HIIT and MICT;<br/>Fasted state;<br/>Position not indicated;<br/>mg dL<sup>-1</sup><br/>Lipid fractions similar between groups at baseline and followup;<br/>Lipid changes:<br/>TC: ↓HIIT&gt;↓MICT;<br/>TRG: ↓HIIT&gt;↑MICT;<br/>HDL-C: ↓MICT&gt;ΔHIIT;</p>                 |

|                        |                                                                                                                                                                                                                         |                                                                                                                                                                                                                                                                                                                                                                                                                                                                                                                                                                                                                                                                                                                                                                                      |                                                                                                                                                                                                                                                                                                                                                                                                                 |
|------------------------|-------------------------------------------------------------------------------------------------------------------------------------------------------------------------------------------------------------------------|--------------------------------------------------------------------------------------------------------------------------------------------------------------------------------------------------------------------------------------------------------------------------------------------------------------------------------------------------------------------------------------------------------------------------------------------------------------------------------------------------------------------------------------------------------------------------------------------------------------------------------------------------------------------------------------------------------------------------------------------------------------------------------------|-----------------------------------------------------------------------------------------------------------------------------------------------------------------------------------------------------------------------------------------------------------------------------------------------------------------------------------------------------------------------------------------------------------------|
|                        |                                                                                                                                                                                                                         | HR <sub>peak</sub> established at baseline, individuals self-adjusted to reach target HR;                                                                                                                                                                                                                                                                                                                                                                                                                                                                                                                                                                                                                                                                                            | LDL-C: ↓HIIT>↓MICT;<br>Not statistically significant                                                                                                                                                                                                                                                                                                                                                            |
| (Keating, et al. 2014) | R 38 (7♂);<br>A HIIT: 11(3♂), MICT: 11(2♂), CON: 11(2♂);<br>HIIT: 41.8 ± 9.7 years<br>MICT: 44.1 ± 6.9 years<br>CON: 42.9 ± 9.4 years<br>Status: Ov<br>HIIT dropout: 2(0♂)<br>MICT dropout: 2(0♂)<br>CON dropout: 1(0♂) | Ergocycle;<br>3 sessions per week<br>12 weeks duration;<br>Non-weight bearing;<br>HIIT: 6 min total warm-up/cool-down (intensity unspecified)<br>HIIT: Wks 1-4 (120% VO <sub>2peak</sub> + <40% VO <sub>2peak</sub> ) x 4 ≈ 12.5-16.5mins per session (work:recovery ratio = 16.7-37.5), Wks 5-12 (120% VO <sub>2peak</sub> + <40% VO <sub>2peak</sub> ) x 6 ≈ 18mins per session (work:recovery ratio 50%);<br>MICT: 3-6 min total warm-up/cool down (intensity unspecified)<br>MICT: Wks 1-2 50-60% VO <sub>2peak</sub> 30-40 mins, Wks 3-12 65% VO <sub>2peak</sub> 45 mins<br>Energy expenditure/workload unmatched;<br>Supervised;<br>HR monitoring device, RPE 6-20 point scale;<br>VO <sub>2peak</sub> estimated at baseline; effort increased to maintain intensity targets; | Measurements taken pre-post intervention;<br>10-hour overnight fasted state;<br>Position not indicated;<br>mmol/L<br>Lipid fraction dis/similarities between groups at baseline not stated;<br>Lipid changes:<br>TC*: ↑MICT >ΔHIIT;<br>TRG: ↓MICT >ΔHIIT;<br>HDL-C: ΔMICT = ΔHIIT;<br>LDL-C*: ↑MICT >ΔHIIT;<br>Not statistically significant<br>*Statistically significant group x time interaction (P < 0.05). |
| (Kemmler, et al. 2014) | R 81♂;<br>A HIIT: 33, MICT: 32, CON: 41;<br>HIIT: 43.9 ± 5.0 years<br>MICT: 42.9 ± 5.1 years<br>CON: 42.5 ± 5.6 years;<br>Status: Ov, MetS;<br>HIIT dropout: 7<br>MICT dropout: 9<br>CON dropout: 0;                    | Running;<br>2 sessions per week at baseline, 3-4 sessions per week from week 8;<br>16 weeks duration;<br>Weight-bearing;<br>No warm-up/cool-down specified;<br>HIIT: (90 sec -12 mins 95-110% IAT-HR + 1-3 mins 70-75% IAT-HR) ≈ 30-40 min per session and 25-45 min 95% IAT-HR;<br>MICT: 35-90 min 70-82.5% IAT-HR;<br>Exercise energy expenditure closely matched;<br>50% sessions per week supervised with HR training device and RPE, individual monthly training log;<br>IAT-HR: HR at individual aerobic threshold IAT (minimum lactate 2.0 mmol/L) established at baseline and adjusted at 8 weeks;                                                                                                                                                                           | Measurements taken pre-post intervention;<br>12-hour overnight fasted state;<br>Position not indicated;<br>mg dL <sup>-1</sup><br>Lipid fractions similar between groups at baseline;<br>Lipid changes:<br>TRG: ↓HIIT*>↓MICT;<br>HDL-C*: ↑HIIT*>↑MICT*<br>*Significant changes within groups;<br>**Significant changes between groups.                                                                          |
| (Kong, et al. 2016)    | R 31♀;<br>A HIIT: 13, A MICT: 13;<br>HIIT: 21.5 ± 4 years<br>MICT: 20.5 ± 1.9 years<br>Status: Ob;<br>HIIT dropout: 2<br>MICT dropout: 3                                                                                | Ergocycle;<br>4 sessions per week<br>5 weeks duration;<br>Non weight-bearing;<br>3 min warm up 50 W;<br>3 min cool-down 50W;<br>HIIT: (8 sec maximum VO <sub>2peak</sub> + 12 sec passive recovery) x 60, average workload ≈ 80 ± 7% VO <sub>2peak</sub> ;<br>MICT: 40 min 60% VO <sub>2peak</sub> first 2 weeks, thereafter 40 min 80% VO <sub>2peak</sub> ;<br>Not work/energy matched;                                                                                                                                                                                                                                                                                                                                                                                            | Measurements taken 96-144 hours pre-intervention during follicular or late luteal phases of subject's cycle, post-intervention 72-120 hours after last training session;<br>12-hour fasted state,<br>Position not indicated;<br>mmol/L<br>Lipid fractions similar between groups at baseline and follow-up;<br>Lipid changes:<br>TC: ↓HIIT>↑MICT;<br>TRG: ↓HIIT>↑MICT;                                          |

|                              |                                                                                                                                                                                                        |                                                                                                                                                                                                                                                                                                                                                                                                                                                                                                                                                            |                                                                                                                                                                                                                                                                                                                                     |
|------------------------------|--------------------------------------------------------------------------------------------------------------------------------------------------------------------------------------------------------|------------------------------------------------------------------------------------------------------------------------------------------------------------------------------------------------------------------------------------------------------------------------------------------------------------------------------------------------------------------------------------------------------------------------------------------------------------------------------------------------------------------------------------------------------------|-------------------------------------------------------------------------------------------------------------------------------------------------------------------------------------------------------------------------------------------------------------------------------------------------------------------------------------|
|                              |                                                                                                                                                                                                        | Supervised;<br>HR monitoring device, RPE 6-20 point scale;<br>VO <sub>2peak</sub> established at baseline; resistance increased after 2 successfully completed sessions at a given resistance by 0.5kg;                                                                                                                                                                                                                                                                                                                                                    | HDL-C: ↑HIIT>ΔMICT;<br>LDL-C: ↓HIIT>↑MICT;<br>Not statistically significant                                                                                                                                                                                                                                                         |
| (Lee, Hsu and Cheng 2016, a) | R 21♂ <sup>7</sup> ; (entire study)<br>Comparison a: MICT group split<br>A HIIT: 13, A MICT: 7;<br>HIIT: 21 ± 1 years<br>MICT: 21 ± 3 years<br>Status: healthy;<br>HIIT dropout: 1<br>MICT dropout: 0  | Ergocycle;<br>3 sessions per week<br>4 weeks duration;<br>Non weight-bearing;<br>5 min warm-up 30% VO <sub>2MAX</sub><br>3 min cool-down 30% VO <sub>2MAX</sub> ;<br>HIIT: 2 weeks (60 sec 85% VO <sub>2MAX</sub> + 120 sec 30% VO <sub>2MAX</sub> ) x 8, 2 weeks (60 sec 90% VO <sub>2MAX</sub> + 120 sec 30% VO <sub>2MAX</sub> ) x 8;<br>MICT: usual activity with no HIIT component ≈ 6 hours per week;<br>Not work/energy matched;<br>HIIT supervised, MICT unsupervised;<br>HR monitoring not specified, VO <sub>2MAX</sub> established at baseline; | Measurements taken pre-post intervention;<br>12-hour fasted state,<br>Position not indicated;<br>mg dL <sup>-1</sup><br>Lipid fractions similar between groups at baseline and follow-up;<br>Lipid changes:<br>TC: ↓MICT>↑HIIT;<br>TRG: ↑HIIT>↑MICT;<br>HDL-C: ↑HIIT>↓MICT;<br>LDL-C: ↓MICT>↓HIIT;<br>Not statistically significant |
| (Lee, Hsu and Cheng 2016, b) | R 21♂ <sup>7</sup> ; (entire study)<br>Comparison b: MICT group split<br>A HIIT: 12, A MICT: 6;<br>HIIT: 21 ± 1 years<br>MICT: 21 ± 3 years;<br>Status: healthy;<br>HIIT dropout: 2<br>MICT dropout: 1 | Ergocycle;<br>3 sessions per week<br>4 weeks duration;<br>Non weight-bearing;<br>5 min warm-up 30% VO <sub>2MAX</sub><br>3 min cool-down 30% VO <sub>2MAX</sub> ;<br>HIIT: 2 weeks (10 sec 85% VO <sub>2MAX</sub> + 20 sec 30% VO <sub>2MAX</sub> ) x 48, 2 weeks (10 sec 90% VO <sub>2MAX</sub> + 20 sec 30% VO <sub>2MAX</sub> ) x 48;<br>MICT: usual activity with no HIIT component ≈ 6 hours per week;<br>Not work/energy matched;<br>HIIT supervised, MICT unsupervised;<br>HR monitoring not specified, VO <sub>2MAX</sub> established at baseline; | Measurements taken pre-post intervention;<br>12-hour fasted state,<br>Position not indicated;<br>mg dL <sup>-1</sup><br>Lipid fractions similar between groups at baseline and follow-up;<br>Lipid changes:<br>TC: ↓MICT>↑HIIT;<br>TRG: ↑HIIT>↑MICT;<br>HDL-C: ↑HIIT>↓MICT;<br>LDL-C: ↓MICT>↓HIIT;<br>Not statistically significant |
| (Lira, et al. 2019)          | R 20♂ <sup>7</sup> ;<br>A HIIT: 10, A MICT: 10<br>HIIT: 26.9 ± 4.7 years<br>MICT: 24.6 ± 3.7 years<br>Status: healthy<br>HIIT dropout: 0<br>MICT dropout: 0                                            | Treadmill running;<br>3 sessions per week;<br>5 weeks duration;<br>Weight-bearing;<br>5 min warm up 50% sVO <sub>2PEAK</sub> ≈ maximal aerobic speed<br>5 min cool down 50% sVO <sub>2PEAK</sub><br>HIIT: (1 min 100% sVO <sub>2PEAK</sub> + 1 min passive recovery) x 10-20 (to equal 5km)<br>MICT: 20-30 mins (to equal 5km) 70% sVO <sub>2PEAK</sub><br>Not energy work/matched;<br>Supervised;<br>HR monitoring, VO <sub>2PEAK</sub> established at baseline, effort increased to maintain intensity targets;                                          | Measurements taken pre-post intervention;<br>12-hour overnight fasted state;<br>Position not indicated;<br>mg dL <sup>-1</sup><br>Lipid fractions similar between groups at baseline and follow-up;<br>Lipid changes:<br>TC: ↓MICT>↑HIIT;<br>TRG: ↓HIIT=↑MICT;<br>HDL-C: ↓MICT >↑HIIT;<br>Not statistically significant             |

|                         |                                                                                                                                                                                                             |                                                                                                                                                                                                                                                                                                                                                                                                                                                                                                                                                                      |                                                                                                                                                                                                                                                                                                                                                                                                                                                                                                                                                |
|-------------------------|-------------------------------------------------------------------------------------------------------------------------------------------------------------------------------------------------------------|----------------------------------------------------------------------------------------------------------------------------------------------------------------------------------------------------------------------------------------------------------------------------------------------------------------------------------------------------------------------------------------------------------------------------------------------------------------------------------------------------------------------------------------------------------------------|------------------------------------------------------------------------------------------------------------------------------------------------------------------------------------------------------------------------------------------------------------------------------------------------------------------------------------------------------------------------------------------------------------------------------------------------------------------------------------------------------------------------------------------------|
| (Maillard, et al. 2016) | <p>R 17 ♀;<br/> A HIIT: 8, A MICT: 8;<br/> Age matched HIIT and MICT, 61-80 years, postmenopausal;<br/> Status: T2D, Ov, Ob;<br/> Aged;<br/> HIIT dropout: 0<br/> MICT dropout: 1;</p>                      | <p>Ergocycle;<br/> 2 sessions per week;<br/> 16 weeks duration;<br/> Non weight-bearing;<br/> 5 min warm-up (intensity unspecified)<br/> 5 min cool-down (intensity unspecified);<br/> HIIT: (8 sec 80% max HR + 12sec 20-30rpm) x 60<br/> MICT: 40 min 55-60% target HR of estimated HRR;<br/> Exercise energy expenditure closely matched;<br/> Supervised;<br/> Mean HR monitored weeks 2, 8, 16, estimated maximum HR (208 - 0.7 x age) and target HR [(est max HR - HR at rest) x target % + HR at rest] calculated at baseline and after 2 months;</p>         | <p>Measurements taken one week before first and 5-7 days after last training session;<br/> Overnight fasted state;<br/> Position not indicated;<br/> mmol/L<br/> Lipid fractions similar between groups at baseline; at follow-up HIIT TRG higher;<br/> Lipid changes:<br/> TC: ↓MICT&gt;↓HIIT;<br/> TRG*: ↓MICT&gt;↑HIIT;<br/> HDL-C: ↑MICT=↑HIIT;<br/> LDL-C: ↓MICT&gt;↑HIIT;<br/> TC/HDL-C**: ↓HIIT&gt;↓MICT<br/> Not statistically significant, *Group effect (HIIT) significant ANOVA p=0.03, **Time effect significant ANOVA p=0.03;</p> |
| (Matsuo, et al. 2015)   | <p>R 26 ♂;<br/> A HIIT: 13, A MICT: 13;<br/> HIIT: 47.5 ± 7 years<br/> MICT: 47.4 ± 7.5 years;<br/> Status: MetS risk factors, Ov<br/> HIIT dropout: 0<br/> MICT dropout: 0;</p>                            | <p>Ergocycle;<br/> 3 sessions per week;<br/> 8 weeks duration;<br/> Non weight-bearing;<br/> 2 min warm-up 30W<br/> 3 min cool-down 30W (MICT only);<br/> HIIT: (3 min 85% VO<sub>2peak</sub> + 2 min 50% VO<sub>2peak</sub>) x 3;<br/> MICT: 40 min 60-65% VO<sub>2peak</sub><br/> Not work/energy matched;<br/> Supervised;<br/> HR monitoring not specified, MHR and VO<sub>2peak</sub> established at baseline and measured at week 4, exercise intensity adjusted at week 4;</p>                                                                                | <p>Measurements taken pre-post intervention;<br/> 12-hour fasted state;<br/> Position not indicated;<br/> mg dL<sup>-1</sup><br/> Lipid fractions similar between groups at baseline;<br/> Lipid changes:<br/> TC: ↑MICT&gt;↑HIIT<br/> TRG: ↓HIIT&gt;↓MICT<br/> HDL-C*: ↑MICT=↑HIIT<br/> LDL-C: ↑HIIT&gt;↓MICT<br/> TC/HDL-C: ↓HIIT*&gt;↓MICT<br/> *Statically significant;</p>                                                                                                                                                                |
| (Mohr, et al. 2014)     | <p>R 62 ♀;<br/> A HIIT: 21, MICT: 21, CON: 20;<br/> HIIT: 44 ± 2 years<br/> MICT: 46 ± 2 years<br/> CON: 45 ± 2 years<br/> Status: H, Ov;<br/> HIIT dropout: 0<br/> MICT dropout: 0<br/> CON dropout: 0</p> | <p>Free-style swimming;<br/> 3 sessions per week<br/> 15 weeks duration;<br/> Non weight-bearing;<br/> HIIT: (30 sec max effort (≈85-95% MHR) + 2 min passive recovery) x 6-10 ≈ 15-25 mins;<br/> MICT: 60 min aiming for max distance ≈ 72-79% MHR;<br/> Not work/energy matched;<br/> Supervised;<br/> HR monitored week 1 and week 15, swimming distances recorded each session, MHR established at baseline, intervals increased at 6 and 12 weeks for HIIT participants, and MICT participants were encouraged to swim further at each session if possible;</p> | <p>Measurements taken pre-post intervention without reference to menstrual cycle;<br/> Overnight fasted state;<br/> Resting position;<br/> mmol/L<br/> Lipid fractions were similar between groups at baseline and follow-up;<br/> Lipid changes:<br/> TC: ↓MICT*&gt;↓HIIT;<br/> HDL-C: ↑MICT&gt;↑HIIT;<br/> LDL-C: ↓MICT=↓HIIT;<br/> Not statistically significant, *statistically significant for sub-group with baseline TC ≥ 5.5 mmol/L;</p>                                                                                               |

|                                |                                                                                                                                                                                                                                                                                                                                                                                   |                                                                                                                                                                                                                                                                                                                                                                                                                                                                                                                                                                                                                         |                                                                                                                                                                                                                                                                                                                                                                                                                                                                                                                                             |
|--------------------------------|-----------------------------------------------------------------------------------------------------------------------------------------------------------------------------------------------------------------------------------------------------------------------------------------------------------------------------------------------------------------------------------|-------------------------------------------------------------------------------------------------------------------------------------------------------------------------------------------------------------------------------------------------------------------------------------------------------------------------------------------------------------------------------------------------------------------------------------------------------------------------------------------------------------------------------------------------------------------------------------------------------------------------|---------------------------------------------------------------------------------------------------------------------------------------------------------------------------------------------------------------------------------------------------------------------------------------------------------------------------------------------------------------------------------------------------------------------------------------------------------------------------------------------------------------------------------------------|
| Morales-Palermo, et al. 2019 a | <p>R: 132 (entire study)<br/>         Comparison a: MICT, CON groups split<br/>         A HIIT: 32 (35% ♀), MICT: 18 (37% ♀), CON: 11 (36% ♀);<br/>         HIIT: 55 ± 8 years<br/>         MICT: 57 ± 7 years<br/>         Status: MetS<br/>         HIIT dropout: 3<br/>         MICT dropout: 4<br/>         CON dropout: 0<br/>         Compliance set at 90% of sessions</p> | <p>Ergocycle<br/>         3 sessions per week;<br/>         16 weeks duration;<br/>         Non weight-bearing;<br/>         HIIT 10 min 70% MHR warm-up/5 min 70% cool-down<br/>         MICT warm-up/cool down included in session<br/>         HIIT: (4 min 90% MHR + 3 min 70% MHR) x 4<br/>         MICT: 50 min 70% MHR<br/>         Not work/energy matched;<br/>         Supervised;<br/>         HR monitoring, MHR established at baseline, effort increased to maintain intensity targets;</p>                                                                                                               | <p>Measurements taken pre- and 48 hours post intervention;<br/>         Overnight fasted state;<br/>         Position not indicated;<br/>         mg dL<sup>-1</sup><br/>         Lipid fractions similar between groups at baseline;<br/>         Lipid changes:<br/>         TC: ↑MICT&gt;↑HIIT<br/>         TRG: ↓MICT&gt;↓HIIT<br/>         HDL-C: ↓MICT&gt;↑HIIT<br/>         LDL-C: ↓MICT&gt;↓HIIT</p>                                                                                                                                |
| Morales-Palermo, et al. 2019 b | <p>R: 132 (entire study)<br/>         A HIIT: 32 (34% ♀), MICT: 18 (37% ♀), CON: 11 (36% ♀);<br/>         HIIT: 58 ± 8 years<br/>         MICT: 57 ± 7 years<br/>         Status: MetS<br/>         HIIT dropout: 4<br/>         MICT dropout: 4<br/>         CON dropout: 0<br/>         Compliance set at 90% of sessions</p>                                                   | <p>Ergocycle<br/>         3 sessions per week;<br/>         16 weeks duration;<br/>         Non weight-bearing;<br/>         HIIT 5 min 70-75% MHR warm-up/5 min 70% cool-down<br/>         MICT warm-up/cool down included in session<br/>         HIIT : (1 min 100%MHR + 1.5 min 65%MHR) x 10<br/>         MICT: 50 min 70% MHR<br/>         Not work/energy matched;<br/>         Supervised;<br/>         HR monitoring, MHR established at baseline, effort increased to maintain intensity targets;</p>                                                                                                          | <p>Measurements taken pre- and 48 hours post intervention;<br/>         Overnight fasted state;<br/>         Position not indicated;<br/>         mg dL<sup>-1</sup><br/>         Lipid fractions similar between groups at baseline;<br/>         Lipid changes:<br/>         TC: ↑MICT&gt;↓HIIT<br/>         TRG: ↓MICT&gt;↓HIIT<br/>         HDL-C: ↑HIIT=↓MICT<br/>         LDL-C: ↑HIIT&gt;↓MICT</p>                                                                                                                                   |
| (Moreira, et al. 2008)         | <p>R: 30 (gender unspecified);<br/>         A 22 (8♂) HIIT: 8, MICT: 8, CON: 6;<br/>         Status: Ob<br/>         Age: 40 ± 8 years<br/>         Total dropout (gender, group unspecified):<br/>         7 stated in tables, 8 stated in text;</p>                                                                                                                             | <p>Ergocycle<br/>         3 sessions per week;<br/>         12 weeks duration;<br/>         Non-weight bearing;<br/>         Warm-up/cool down unspecified;<br/>         HIIT: (2 mins [Anaerobic Threshold+(AT x 20%)] + 1 min passive recovery) x 20*<br/>         MICT: 60* mins [AT-(AT x 10%)]<br/>         Exercise time matched;<br/>         HR monitoring device;<br/>         Anaerobic Threshold (AT) established at baseline, training target intensity maintained;<br/>         *Commencing in week 1 with 20 mins per session and incrementally adjusting time until week 6 with 60 mins per session.</p> | <p>Measurements pre-post intervention within 7 day period;<br/>         10-hour fasted state;<br/>         Position not indicated;<br/>         mg dL<sup>-1</sup><br/>         Lipid fractions similar between groups at baseline.<br/>         Lipid changes‡:<br/>         TC: ↓MICT 182 ± 29 – 155 ± 15* &gt; ΔHIIT 163 ± 11 - 163 ± 22<br/>         TG: ↓MICT 204 ± 80 - 197 ± 84 &gt; ↓HIIT 207 ± 130 - 206 ± 90<br/>         *Statistically significant pre/post MICT values.<br/>         ‡measurements determined from graphic</p> |
| (Nybo, et al. 2010)            | <p>R 36♂;<br/>         A HIIT: 8; MICT: 9; Strength (STR): 8; CON: 11;<br/>         HIIT: 37 ± 3 years<br/>         MICT: 31 ± 2 years<br/>         STR: 36 ± 2 years</p>                                                                                                                                                                                                         | <p>Running;<br/>         3 sessions per week;<br/>         12 weeks duration;<br/>         Weight-bearing;<br/>         HIIT: 5 min warm-up 65% HRR<br/>         + [(2 min finishing at 90-95% MHR (85% VO<sub>2MAX</sub>) + 1 min recovery (effort unspecified)] x 5</p>                                                                                                                                                                                                                                                                                                                                               | <p>Measurements taken pre-post intervention;<br/>         Overnight fasted state;<br/>         Resting position;<br/>         mmol/L<br/>         Lipid fractions similar between groups at baseline;<br/>         Lipid changes:</p>                                                                                                                                                                                                                                                                                                       |

|                        |                                                                                                                                                                                                                                                                                                                                                               |                                                                                                                                                                                                                                                                                                                                                                                                                                                                                                                                                                                                                                                                                                                                                                                                                                     |                                                                                                                                                                                                                                                                                                                                                                                                                   |
|------------------------|---------------------------------------------------------------------------------------------------------------------------------------------------------------------------------------------------------------------------------------------------------------------------------------------------------------------------------------------------------------|-------------------------------------------------------------------------------------------------------------------------------------------------------------------------------------------------------------------------------------------------------------------------------------------------------------------------------------------------------------------------------------------------------------------------------------------------------------------------------------------------------------------------------------------------------------------------------------------------------------------------------------------------------------------------------------------------------------------------------------------------------------------------------------------------------------------------------------|-------------------------------------------------------------------------------------------------------------------------------------------------------------------------------------------------------------------------------------------------------------------------------------------------------------------------------------------------------------------------------------------------------------------|
|                        | <p>CON: 30 ± 2 years;<br/>         Status: Healthy<br/>         HIIT dropout: 0<br/>         MICT dropout: 0<br/>         STR dropout: 0<br/>         CON dropout: 0</p>                                                                                                                                                                                      | <p>MICT: 60 mins 80% MHR (65% VO<sub>2MAX</sub>)<br/>         Not work/energy matched;<br/>         Supervision not indicated;<br/>         Monitoring not indicated;<br/>         MHR and VO<sub>2MAX</sub> established at baseline, training target intensity maintained;</p>                                                                                                                                                                                                                                                                                                                                                                                                                                                                                                                                                     | <p>TC: ↓MICT&gt;↓HIIT;<br/>         HDL-C: ↑MICT&gt;ΔHIIT;<br/>         LDL-C: ↓MICT=↓HIIT;<br/>         TC/HDL-C ratio: ↓MICT*&gt;ΔHIIT<br/>         Not statistically significant<br/>         *Statistically significant pre-post intervention</p>                                                                                                                                                             |
| (Ramos, et al. 2016)   | <p>R 43 (♂ and ♀ as percentage);<br/>         A HIIT: 22(55%♂), MICT: 10(71%♂)<br/>         HIIT: 56 ± 10 years<br/>         MICT: 57 ± 9 years<br/>         Status: H, MetS, T2D;<br/>         HIIT dropout: 7 (gender unspecified)<br/>         MICT dropout: 4 (gender unspecified)</p>                                                                    | <p>Ergocycle or treadmill per supervised sessions, unsupervised sessions e.g. running, swimming, walking, rowing;<br/>         HIIT: 3 sessions per week;<br/>         MICT: 5 sessions per week;<br/>         16 weeks duration;<br/>         Weight- and non weight-bearing<br/>         HIIT: (4 min 85-95% HR<sub>peak</sub> + 3 min 50-70% HR<sub>peak</sub>) x 4; 10 min warm-up 60-70% HR<sub>peak</sub><br/>         MICT: 30 min 60-70% HR<sub>peak</sub> including warm-up and cool-down 60-70% HR<sub>peak</sub><br/>         Not work/energy matched;<br/>         Two sessions per week supervised;<br/>         HR monitoring device, Borg 6-20 ratings measured, training log;<br/>         VO<sub>2MAX</sub> established at baseline using either ergocycle or treadmill, training target intensity maintained;</p> | <p>Measurements were taken pre-post intervention<br/>         12-hour fasted state;<br/>         mmol/L<br/>         Lipid fractions were similar between groups at baseline and follow-up;<br/>         Lipid changes:<br/>         TRG: ↓HIIT&gt;↓MICT<br/>         HDL-C: ↑MICT=↑HIIT<br/>         Not statistically significant</p>                                                                           |
| (Ruffino, et al. 2017) | <p>R: 21♂<br/>         A: 8 HIIT; 8 MICT<br/>         55 ± 5 years;<br/>         Status: T2D, Ob, Ov<br/>         HIIT dropout: 2<br/>         MICT dropout: 3<br/>         Compliance requirement: miss &gt;20% of the total training sessions or 3 consecutive sessions, or the final session before post-intervention testing for either HIIT or MICT;</p> | <p>HIIT: Ergocycle; MICT: walking<br/>         HIIT: 3 sessions per week; MICT: 5 sessions per week<br/>         8 weeks duration<br/>         HIIT: (3 mins warm up 25W, 10-20 secs sprint 86±6%-88±6% MHR, 3 minutes recovery 25W, 10-20 secs sprint 86±6%-88±6% MHR, 3 minutes cool down 25W) x 1. Sprints 10 secs in sessions 1–4, 15 secs in sessions 5–12, and 20 secs in last 12 sessions.<br/>         MICT: 30-min walking at 40% HRR Wk 1-2, 50% HRR Wk 3-4, 55% HRR Wk 5–8<br/>         HIIT: non-weight bearing;<br/>         MICT: weight-bearing;<br/>         HIIT: all sessions supervised;<br/>         MICT: 3 sessions supervised;<br/>         HR monitoring device, RPE (6-20 Borg scale) recorded each final session every week;</p>                                                                          | <p>Measurements taken pre intervention and 3 days post intervention;<br/>         Overnight fasted state; Seated position;<br/>         mmol/L<br/>         Lipid fractions were similar between groups at baseline and follow-up;<br/>         Lipid changes:<br/>         TRG: ↓MICT=↓HIIT<br/>         HDL-C: ↑HIIT&gt;ΔMICT<br/>         LDL-C: ↑HIIT&gt;↓MICT<br/>         Not statistically significant</p> |
| (Sawyer, et al. 2016)  | <p>R 22;<br/>         A HIIT: 9(5♂); MICT: 9(4♂)<br/>         HIIT: 35.6 ± 8.9 years<br/>         MICT: 34.8 ± 7.7 years<br/>         Status: Ob<br/>         HIIT dropout: 2 (gender unspecified)<br/>         MICT dropout: 2 (gender unspecified)</p>                                                                                                      | <p>Ergocycle;<br/>         3 sessions per week;<br/>         8 weeks duration;<br/>         Non weight-bearing;<br/>         HIIT and MICT: 5 min warm-up 50-60% MHR<br/>         HIIT: 4 min cool-down 50-60% MHR<br/>         MICT: 5 min cool-down 50-60% MHR<br/>         HIIT: (1 min 90-95% MHR + 1 min active recovery 25-50 Watts) x 10</p>                                                                                                                                                                                                                                                                                                                                                                                                                                                                                 | <p>Measurements taken 72 hours pre/post first/last exercise session<br/>         10-hour fasted state; Position not indicated;<br/>         mg dL<sup>-1</sup><br/>         Lipid fractions were similar between groups at baseline and follow-up;<br/>         Lipid changes:<br/>         TC: ↑HIIT&gt;↑MICT<br/>         TRG: ↑MICT&gt;↓HIIT</p>                                                               |



|                          |                                                                                                                                                                                                                                                                                                     |                                                                                                                                                                                                                                                                                                                                                                                                                                                                                                                                                                                                                                   |                                                                                                                                                                                                                                                                                                                                                                                                                                                   |
|--------------------------|-----------------------------------------------------------------------------------------------------------------------------------------------------------------------------------------------------------------------------------------------------------------------------------------------------|-----------------------------------------------------------------------------------------------------------------------------------------------------------------------------------------------------------------------------------------------------------------------------------------------------------------------------------------------------------------------------------------------------------------------------------------------------------------------------------------------------------------------------------------------------------------------------------------------------------------------------------|---------------------------------------------------------------------------------------------------------------------------------------------------------------------------------------------------------------------------------------------------------------------------------------------------------------------------------------------------------------------------------------------------------------------------------------------------|
|                          |                                                                                                                                                                                                                                                                                                     | <p>MICT: 30 min 70–75% MHR</p> <p>Not work/energy matched;</p> <p>Supervised;</p> <p>HR monitoring device;</p> <p>VO<sub>2</sub>MAX established at baseline and measured at end of Weeks 4 and 8, training target intensity maintained;</p>                                                                                                                                                                                                                                                                                                                                                                                       | <p>HDL-C: ↑HIIT&gt;↓MICT</p> <p>LDL-C: ↑HIIT&gt;↑MICT</p> <p>Not statistically significant</p>                                                                                                                                                                                                                                                                                                                                                    |
| (Shepherd, et al. 2015)  | <p>R 90;</p> <p>A HIIT: 42(12♂, 30♀) MICT: 36(14♂, 22♀)</p> <p>HIIT: 42 ± 11 years</p> <p>MICT: 43 ± 11 years</p> <p>Status: Ov</p> <p>HIIT dropout: 4 (3♂)</p> <p>MICT dropout: 8 (1♂)</p>                                                                                                         | <p>Ergocycle;</p> <p>HIIT: 3 sessions per week</p> <p>MICT: 5 sessions per week</p> <p>10 weeks duration;</p> <p>Non weight-bearing;</p> <p>HIIT 5 min warm-up and cool-down</p> <p>MICT warm up and cool-down included in session;</p> <p>HIIT: 15-60 sec &gt;90% MHR + 45-120 sec passive recovery ≈ 22 min session</p> <p>MICT: 30-45 min progression over 10 weeks 70% MHR;</p> <p>Not work/energy matched;</p> <p>3 instructor-led sessions per week;</p> <p>HR monitoring device, participants self-monitored HR and adjusted effort levels, individual training log;</p> <p>VO<sub>2</sub>MAX established at baseline;</p> | <p>Measurements taken pre and 48-120 hours after last training session post intervention</p> <p>10-hour fasted state; Resting position;</p> <p>mmol/L</p> <p>Lipid fractions were similar between groups at baseline and follow-up;</p> <p>Lipid changes:</p> <p>TC: ↓MICT&gt;↓HIIT</p> <p>TRG: ↓HIIT&gt;↓MICT</p> <p>HDL-C: ↑MICT&gt;↑HIIT</p> <p>LDL-C: ↓HIIT=↓MICT</p> <p>LDL-C/HDL-C: ↓MICT&gt;↓HIIT</p> <p>Not statistically significant</p> |
| (Thomas, et al. 1985, a) | <p>R 48♂ (entire study);</p> <p>A 36 (entire study)</p> <p>Comparison a (MICT, CON groups split):</p> <p>HIIT: 8 ; MICT 6; CON: 4;</p> <p>HIIT: 23.1 ± 1.9 years</p> <p>MICT: 23 ± 1.2 years</p> <p>CON: 21.9 ± 1 years</p> <p>Status: healthy</p> <p>Dropout: 6</p> <p>Compliance minimum: 90%</p> | <p>Running;</p> <p>3 sessions per week;</p> <p>11 weeks duration;</p> <p>Weight-bearing;</p> <p>Warm up cool down not indicated;</p> <p>HIIT: (4 min 90-100% MHR + 4 min &lt; 50% MHR) x 6</p> <p>MICT: 60 mins 75-85% MHR</p> <p>Work matched;</p> <p>Supervised;</p> <p>HR monitoring with radial artery palpation;</p> <p>VO<sub>2</sub>MAX established at baseline, MICT progressed to and maintained 12km/h speed (approximating 85% MHR).</p>                                                                                                                                                                               | <p>Measurements taken pre-, mid-, and post-intervention,</p> <p>12-hour fasted state; Position not stated;</p> <p>mg dL<sup>-1</sup></p> <p>Lipid fractions were similar between groups at baseline and follow-up;</p> <p>Lipid changes:</p> <p>TC: ↑MICT=↓HIIT</p> <p>HDL-C: ↓MICT&gt;ΔHIIT</p> <p>Not statistically significant</p>                                                                                                             |
| (Thomas, et al. 1985, b) | <p>R 48♂ (entire study)</p> <p>A 36</p> <p>Comparison b (MICT, CON groups split):</p> <p>HIIT: 9; MICT 5; CON: 4</p> <p>HIIT: 22.8 ± 1.1 years</p> <p>MICT: 23 ± 1.2 years</p> <p>CON: 21.9 ± 1 years</p> <p>Status: healthy</p>                                                                    | <p>Running;</p> <p>3 sessions per week;</p> <p>11 weeks duration;</p> <p>Weight-bearing;</p> <p>Warm up cool down not indicated;</p> <p>HIIT: (2 min 90-100% MHR + 3 min &lt; 50% MHR) x 8</p> <p>MICT: 60 mins 75-85% MHR</p> <p>Work matched;</p>                                                                                                                                                                                                                                                                                                                                                                               | <p>Measurements taken pre-, mid-, and post-intervention,</p> <p>12-hour fasted state; Position not stated;</p> <p>mg dL<sup>-1</sup></p> <p>Lipid fractions were similar between groups at baseline and follow-up;</p> <p>Lipid changes:</p> <p>TC: =↓HIIT &gt;↑MICT</p> <p>HDL-C: ↓MICT&gt;↓HIIT</p>                                                                                                                                             |

|                                  |                                                                                                                                                                                                                                                                    |                                                                                                                                                                                                                                                                                                                                                                                                                                                                                                                                                                                  |                                                                                                                                                                                                                                                                                                                                                                                                                  |
|----------------------------------|--------------------------------------------------------------------------------------------------------------------------------------------------------------------------------------------------------------------------------------------------------------------|----------------------------------------------------------------------------------------------------------------------------------------------------------------------------------------------------------------------------------------------------------------------------------------------------------------------------------------------------------------------------------------------------------------------------------------------------------------------------------------------------------------------------------------------------------------------------------|------------------------------------------------------------------------------------------------------------------------------------------------------------------------------------------------------------------------------------------------------------------------------------------------------------------------------------------------------------------------------------------------------------------|
|                                  | Dropout: 6<br>Compliance minimum: 90%                                                                                                                                                                                                                              | Supervised;<br>HR monitoring with radial artery palpation;<br>VO <sub>2</sub> MAX established at baseline, MICT progressed to and maintained 12km/h speed (approximating 85% MHR).                                                                                                                                                                                                                                                                                                                                                                                               | Not statistically significant                                                                                                                                                                                                                                                                                                                                                                                    |
| (Tjønnna, et al. 2008)           | R 32;<br>A HIIT: 11(4♂); MICT: 8(4♂); CON: 9(5♂)<br>HIIT: 55.3 ± 13.2 years<br>MICT: 52 ± 10.6 years<br>CON: 49.6 ± 9 years<br>Status: MetS<br>HIIT dropout: 1 (gender unspecified)<br>MICT dropout: 2 (gender unspecified)<br>CON dropout: 1 (gender unspecified) | Inclined treadmill walking/running<br>3 sessions per week;<br>8 weeks duration;<br>Weight-bearing;<br>HIIT 10 min warm-up, 2 min cool down<br>MICT warm- up and cool-down included in session;<br>HIIT: (4 min 90% MHR + 3 min active recovery 70% MHR) x 4<br>MICT: 47 min 70% MHR;<br>Exercise energy matched;<br>Supervision not indicated;<br>HR monitoring device;<br>VO <sub>2</sub> MAX established at baseline, training target intensity maintained;                                                                                                                    | Measurements taken pre-post intervention<br>Fasted state;<br>Position not stated;<br>mmol/L<br>Lipid fractions were similar between groups at baseline and TRG at follow-up;<br>Lipid changes:<br>TRG: ↑MICT>↑HIIT<br>HDL-C: ↑HIIT*>↑MICT<br>Not statistically significant, *Statistically significant from baseline and between groups.                                                                         |
| (Vella, Taylor and Drummer 2017) | R 19;<br>A HIIT: 8(2♂); MICT 9(5♂);<br>HIIT: 23.1 ± 6.6 years<br>MICT: 28.9 ± 8.1 years<br>Status: Ov, Ob;<br>HIIT dropout: 1<br>MICT dropout: 1                                                                                                                   | Treadmill, ergocycle, elliptical;<br>4 sessions per week;<br>8 weeks duration;<br>Weight- and non weight-bearing;<br>5 min warm-up 35-40% HRR;<br>5 min cool-down 35-40% HRR;<br>HIIT: (1 min 75-80% HRR + 1 min active recovery 35-40% HRR) x 10<br>MICT: 20min 55-59% HRR;<br>Exercise energy matched;<br>First 3 weeks, per week 3 sessions 1-1 supervised, 4 <sup>th</sup> session unsupervised. Last 5 weeks all sessions unsupervised;<br>HR monitoring device, individual training log;<br>VO <sub>2</sub> PEAK established at baseline, progressive workload adjustment; | Measurements taken pre and >48 hours after last exercise session post intervention,<br>12-hour fasted state;<br>Position not stated;<br>mmol/L<br>Lipid fractions were similar between groups at baseline;<br>Lipid changes:<br>TC: ↓HIIT>↓MICT<br>TRG: ↑HIIT=↑MICT<br>HDL-C: ↑MICT >↓HIIT*<br>LDL-C: ↓HIIT*>ΔMICT<br>Not statistically significant, *Significantly significant from baseline and between groups |
| (Winding, et al. 2018)           | R 35;<br>A HIIT: 13(7♂); MICT: 12(7♂); CON: 7(5♂);<br>HIIT: 54 ± 6 years<br>MICT: 58 ± 8 years<br>CON: 57 ± 7 years;<br>Status: T2D, Ov;<br>HIIT dropout: 2 (gender unspecified)<br>MICT dropout: 0 (gender unspecified)<br>CON dropout: 1 (gender unspecified)    | Ergocycle;<br>3 sessions per week;<br>11 weeks duration;<br>Non weight-bearing;<br>5 min warm-up 40% peak workload (W <sub>peak</sub> )<br>no cool-down specified;<br>HIIT: (1 min 95% W <sub>peak</sub> + 1 min active recovery 20% W <sub>peak</sub> ) x 20<br>MICT: 40 min 50% W <sub>peak</sub> ;<br>Not work/energy matched;<br>Supervision not indicated;<br>HR monitoring device;                                                                                                                                                                                         | Measurements taken pre-post intervention 24-72 hours prior to first and 24-120 hours after last training session<br>10-hour fasted state;<br>Position not stated;<br>mmol/L<br>Lipid fractions were similar between groups at baseline;<br>Lipid changes:<br>TC: ↓HIIT>↓MICT<br>TRG: ↓HIIT>↑MICT<br>HDL-C: ↓MICT>ΔHIIT<br>LDL-C: ↓MICT=↓HIIT                                                                     |

|                      |                                                                                                                                                                                                         |                                                                                                                                                                                                                                                                                                                                                                                                                                                                                                                                                                                                             |                                                                                                                                                                                                                                                                                                                                                                                |
|----------------------|---------------------------------------------------------------------------------------------------------------------------------------------------------------------------------------------------------|-------------------------------------------------------------------------------------------------------------------------------------------------------------------------------------------------------------------------------------------------------------------------------------------------------------------------------------------------------------------------------------------------------------------------------------------------------------------------------------------------------------------------------------------------------------------------------------------------------------|--------------------------------------------------------------------------------------------------------------------------------------------------------------------------------------------------------------------------------------------------------------------------------------------------------------------------------------------------------------------------------|
|                      |                                                                                                                                                                                                         | VO <sub>2PEAK</sub> established at baseline, measured during weeks 4 and 8, training target intensity maintained;                                                                                                                                                                                                                                                                                                                                                                                                                                                                                           | Not statistically significant                                                                                                                                                                                                                                                                                                                                                  |
| (Winn, et al. 2018)  | R 23; (gender assumed mixed)<br>A 21; HIIT: 8; MICT: 8; CON: 5<br>HIIT: 41 ± 14 years<br>MICT: 46 ± 9 years<br>CON: 51 ± 13 years<br>Status: Ob<br>HIIT dropout: 1<br>MICT dropout: 1<br>CON dropout: 0 | Treadmill<br>4 sessions per week;<br>4 weeks duration;<br>Weight-bearing;<br>Warm-up/cool-down not stated;<br>HIIT: 4 min 80% VO <sub>2peak</sub> + 3 min 50% VO <sub>2peak</sub> approx 60min<br>MICT: 60 mins 55% VO <sub>2peak</sub> approx 60 min<br>Exercise energy expenditure matched;<br>Supervised;<br>HR monitoring device;<br>VO <sub>2PEAK</sub> established at baseline, measured every 4 <sup>th</sup> session, training target intensity maintained;                                                                                                                                         | Measurements taken pre and 36-48 hours after last training session post intervention,<br>10-hour fasted state;<br>Position not stated;<br>mg dL <sup>-1</sup><br>Lipid fractions were similar between groups at baseline and follow-up;<br>Lipid changes:<br>TC: ↓HIIT>↓MICT<br>TRG: ↓HIIT>↓MICT<br>HDL-C: ↑HIIT >↓MICT<br>LDL-C: ↓HIIT>↓MICT<br>Not statistically significant |
| (Zhang, et al. 2015) | R 43 ♀;<br>A 35: HIIT: 12, MICT: 12, CON: 11;<br>HIIT: 21.0±1.0 years<br>MICT: 20.6±1.2 years<br>CON: 20.9±1.0 years<br>Status: Ob<br>HIIT dropout: 2<br>MICT dropout: 3<br>CON dropout: 3              | Treadmill running;<br>4 sessions per week<br>12 weeks<br>Weight-bearing<br>10-minute warm-up and 5-minute cool down 50–60% of HR <sub>peak</sub><br>HIIT: (4 min 85–95% HR <sub>peak</sub> + 3 min 50–60% HR <sub>peak</sub> + 7 min passive recovery) x 4. Week 1-2 85%, week 3-4 90%, week 5+, 95% HR <sub>peak</sub><br>MICT: 33 mins 60–70% HR <sub>peak</sub> . Week 1-2 60% HR <sub>peak</sub> , Week 3-4 65%, Week 5+ 70% HR <sub>peak</sub> ;<br>Oxygen cost matched;<br>Supervised;<br>HR monitoring device;<br>VO <sub>2MAX</sub> established at baseline, running speed maintained after week 5; | Measurements taken one week pre-intervention and 3 days post intervention;<br>Overnight fasted state; Resting position;<br>mmol/L<br>Lipid fractions were similar between groups at baseline;<br>Lipid changes:<br>TC*: ↓MICT>↓HIIT<br>TRG: ↓HIIT>↑MICT<br>*Statistically significant from baseline.<br>Not statistically significant.                                         |

Table [2] Sub-analyses

| Studies                                                                                  | Number of studies | Participant totals | Effect Estimate MD [IV, RE, 95% CI]* | P value | I <sup>2</sup> |
|------------------------------------------------------------------------------------------|-------------------|--------------------|--------------------------------------|---------|----------------|
| <b>1.1 Total Cholesterol</b>                                                             | 24                | 653                | 0.10 [-0.03, 0.22]                   | 0.12    | 0%             |
| 1.2 TC Sub-analyses                                                                      | 24                | 653                |                                      |         |                |
| 1.2.1 Age ≥ 5                                                                            | 5                 | 169                | 0.11 [-0.20, 0.42]                   | 0.5     | 0%             |
| 1.2.2 Age 5-15                                                                           | 9                 | 281                | 0.10 [-0.07, 0.28]                   | 0.24    | 0%             |
| 1.2.3 Age ≥ 5                                                                            | 10                | 203                | 0.08 [-0.12, 0.29]                   | 0.43    | 0%             |
| 1.2.4 Females only                                                                       | 6                 | 160                | 0.07 [-0.16, 0.31]                   | 0.54    | 0%             |
| 1.2.5 Males only                                                                         | 8                 | 157                | 0.12 [-0.13, 0.36]                   | 0.34    | 0%             |
| 1.2.6 MetS or MetS factors/risk                                                          | 16                | 498                | 0.08 [-0.06, 0.22]                   | 0.28    | 0%             |
| 1.2.7 estex score ≥ 10                                                                   | 16                | 478                | 0.09 [-0.06, 0.24]                   | 0.22    | 0%             |
| 1.2.8 estex score ≥ 10                                                                   | 8                 | 175                | 0.11 [-0.11, 0.33]                   | 0.34    | 0%             |
| 1.2.9 Weight-bearing                                                                     | 8                 | 144                | 0.01 [-0.21, 0.23]                   | 0.94    | 0%             |
| Test for subgroup differences: Chi <sup>2</sup> =0.67, df=8 (P=0.00), I <sup>2</sup> =0% |                   |                    |                                      |         |                |
| <b>1.3 Triglycerides</b>                                                                 | 25                | 736                | -0.05 [-0.11, 0.01]                  | 0.1     | 0%             |
| 1.4 TG Sub-analyses                                                                      | 25                | 736                |                                      |         |                |
| 1.4.1 Age ≥ 5                                                                            | 6                 | 212                | 0.00 [-0.21, 0.22]                   | 0.97    | 0%             |
| 1.4.2 Age 5-15                                                                           | 12                | 366                | -0.10 [-0.19, 0.01]                  | 0.03    | 0%             |
| 1.4.2 Age 5-15 (K-1)**                                                                   | 11                | 301                | -0.06 [-0.17, 0.05]                  | 0.27    | 0%             |
| 1.4.3 Age ≥ 5                                                                            | 7                 | 158                | -0.01 [-0.10, 0.08]                  | 0.84    | 0%             |
| 1.4.4 Females only                                                                       | 5                 | 118                | -0.08 [-0.21, 0.05]                  | 0.24    | 0%             |
| 1.4.5 Males only                                                                         | 7                 | 193                | -0.03 [-0.14, 0.09]                  | 0.64    | 26%            |
| 1.4.6 MetS or MetS factors/risk                                                          | 20                | 626                | -0.10 [-0.18, 0.02]                  | 0.01    | 0%             |
| 1.4.6 MetS or MetS factors/risk (K-1)**                                                  | 19                | 561                | -0.07 [-0.17, 0.02]                  | 0.13    | 0%             |
| 1.4.7 estex score ≥ 10                                                                   | 20                | 621                | -0.04 [-0.11, 0.03]                  | 0.28    | 0%             |
| 1.4.8 estex score ≥ 10                                                                   | 5                 | 115                | -0.11 [-0.24, 0.03]                  | 0.13    | 0%             |
| 1.4.9 Weight-bearing                                                                     | 8                 | 226                | -0.11 [-0.21, 0.00]                  | 0.04    | 0%             |
| 1.4.9 Weight-bearing (K-1)**                                                             | 7                 | 161                | -0.05 [-0.19, 0.09]                  | 0.45    | 0%             |
| Test for subgroup differences: Chi <sup>2</sup> =0.37, df=8 (P=0.91), I <sup>2</sup> =0% |                   |                    |                                      |         |                |
| <b>1.5 HDL-Cholesterol</b>                                                               | 26                | 739                | 0.07 [0.04, 0.11]                    | 0.001   | 0%             |
| 1.6 HDL-C Sub-analyses                                                                   | 27                | 739                |                                      |         |                |
| 1.6.1 Age ≥ 5                                                                            | 6                 | 176                | 0.02 [-0.09, 0.14]                   | 0.67    | 0%             |
| 1.6.2 Age 5-15                                                                           | 12                | 405                | 0.06 [-0.00, 0.12]                   | 0.06    | 42%            |
| 1.6.3 Age ≥ 5                                                                            | 9                 | 178                | 0.10 [-0.01, 0.20]                   | 0.07    | 49%            |
| 1.6.4 Females only                                                                       | 5                 | 136                | 0.03 [-0.08, 0.14]                   | 0.6     | 0%             |
| 1.6.5 Males only                                                                         | 10                | 250                | 0.11 [0.03, 0.19]                    | 0.007   | 52%            |
| 1.6.5 Males only (K-1)**                                                                 | 9                 | 185                | 0.09 [-0.01, 0.19]                   | 0.07    | 54%            |
| 1.6.6 MetS or MetS factors/risk                                                          | 19                | 605                | 0.06 [0.02, 0.11]                    | 0.002   | 14%            |
| 1.6.6 MetS or MetS factors/risk (K-1)**                                                  | 18                | 540                | 0.04 [-0.00, 0.08]                   | 0.08    | 0%             |
| 1.6.7 estex score ≥ 10                                                                   | 20                | 598                | 0.08 [0.03, 0.14]                    | 0.003   | 40%            |
| 1.6.8 estex score ≥ 10                                                                   | 7                 | 161                | 0.02 [-0.05, 0.10]                   | 0.52    | 0%             |
| 1.6.9 Weight-bearing                                                                     | 10                | 234                | 0.13 [0.06, 0.21]                    | 0.0006  | 37%            |
| 1.6.9 Weight-bearing (K-1)**                                                             | 9                 | 169                | 0.11 [0.00, 0.21]                    | 0.05    | 43%            |
| Test for subgroup differences: Chi <sup>2</sup> =0.00, df=8 (P=0.54), I <sup>2</sup> =0% |                   |                    |                                      |         |                |
| <b>1.7 LDL-Cholesterol</b>                                                               | 20                | 580                | 0.05 [-0.06, 0.17]                   | 0.37    | 0%             |
| 1.8 LDL-C Sub-analyses                                                                   | 20                | 580                |                                      |         |                |
| 1.8.1 Age ≥ 5                                                                            | 5                 | 168                | 0.21 [-0.05, 0.47]                   | 0.11    | 0%             |
| 1.8.2 Age 5-15                                                                           | 9                 | 281                | -0.02 [-0.18, 0.15]                  | 0.84    | 0%             |
| 1.8.3 Age ≥ 5                                                                            | 6                 | 131                | 0.06 [-0.14, 0.26]                   | 0.58    | 0%             |
| 1.8.4 Females only                                                                       | 5                 | 136                | 0.03 [-0.22, 0.29]                   | 0.81    | 0%             |
| 1.8.5 Males only                                                                         | 6                 | 125                | 0.14 [-0.08, 0.35]                   | 0.21    | 0%             |
| 1.8.6 MetS or MetS factors/risk                                                          | 15                | 473                | 0.03 [-0.10, 0.17]                   | 0.61    | 0%             |
| 1.8.7 estex score ≥ 10                                                                   | 16                | 473                | 0.08 [-0.05, 0.20]                   | 0.23    | 0%             |
| 1.8.8 estex score ≥ 10                                                                   | 4                 | 107                | -0.08 [-0.38, 0.22]                  | 0.59    | 0%             |
| 1.8.9 Weight-bearing                                                                     | 4                 | 72                 | -0.20 [-0.48, 0.08]                  | 0.17    | 0%             |
| Test for subgroup differences: Chi <sup>2</sup> =0.64, df=8 (P=0.58), I <sup>2</sup> =0% |                   |                    |                                      |         |                |

\*MD=Mean Difference, IV=Inverse Variance, RE=Random Effects, CI=Confidence Interval

\*\*Kemmler 2014

Table [3] TESTEX Assessment of Study Quality

| STUDY                           | Eligibility criteria specified | Randomisation specified | Allocation concealment | Groups similar at baseline | Blinding of assessor | Outcomes measured assessed in 5% patients <sup>a</sup> | Intention-to-treat analysis | Between-group statistical comparisons | Point measures and measures of variability for all reported outcome measures | Activity monitoring in control groups <sup>c</sup> | Relative exercise intensity remained | Exercise volume and energy expenditure | Overall TESTEX (/15) |
|---------------------------------|--------------------------------|-------------------------|------------------------|----------------------------|----------------------|--------------------------------------------------------|-----------------------------|---------------------------------------|------------------------------------------------------------------------------|----------------------------------------------------|--------------------------------------|----------------------------------------|----------------------|
| Ciolac <sup>2010</sup>          | 1                              | 0                       | 0                      | 1                          | 1                    | 1                                                      | 0                           | 2                                     | 1                                                                            | 1                                                  | 0                                    | 1                                      | 9                    |
| Connolly <sup>2017</sup>        | 0                              | 0                       | 1                      | 0                          | 1                    | 2                                                      | 0                           | 2                                     | 1                                                                            | 1                                                  | 1                                    | 1                                      | 10                   |
| Cuddy <sup>2019</sup>           | 1                              | 0                       | 0                      | 1                          | 1                    | 1                                                      | 0                           | 2                                     | 1                                                                            | 1                                                  | 1                                    | 0                                      | 9                    |
| Fisher <sup>2015</sup>          | 1                              | 1                       | 1                      | 1                          | 1                    | 0                                                      | 1                           | 2                                     | 1                                                                            | 1                                                  | 0                                    | 1                                      | 11                   |
| Hwang <sup>2016</sup>           | 1                              | 1                       | 1                      | 1                          | 1                    | 2                                                      | 0                           | 1                                     | 1                                                                            | 1                                                  | 1                                    | 1                                      | 12                   |
| Keating <sup>2014</sup>         | 1                              | 1                       | 0                      | 0                          | 1                    | 3                                                      | 1                           | 2                                     | 1                                                                            | 1                                                  | 1                                    | 1                                      | 13                   |
| Kemmler <sup>2014</sup>         | 0                              | 1                       | 1                      | 1                          | 1                    | 2                                                      | 0                           | 1                                     | 1                                                                            | 1                                                  | 1                                    | 0                                      | 10                   |
| Kong <sup>2016</sup>            | 1                              | 0                       | 1                      | 0                          | 1                    | 0                                                      | 0                           | 2                                     | 1                                                                            | 1                                                  | 0                                    | 1                                      | 8                    |
| Lee <sup>2016</sup>             | 1                              | 0                       | 1                      | 1                          | 1                    | 1                                                      | 0                           | 2                                     | 1                                                                            | 1                                                  | 1                                    | 1                                      | 11                   |
| Lira <sup>2019</sup>            | 1                              | 0                       | 0                      | 1                          | 1                    | 2                                                      | 1                           | 1                                     | 1                                                                            | 1                                                  | 1                                    | 0                                      | 10                   |
| Maillard <sup>2016</sup>        | 1                              | 0                       | 0                      | 1                          | 1                    | 2                                                      | 0                           | 2                                     | 1                                                                            | 1                                                  | 1                                    | 1                                      | 11                   |
| Matsuo <sup>2015</sup>          | 1                              | 1                       | 1                      | 1                          | 1                    | 2                                                      | 1                           | 2                                     | 1                                                                            | 1                                                  | 1                                    | 1                                      | 14                   |
| Mohr <sup>2014</sup>            | 0                              | 0                       | 0                      | 0                          | 1                    | 2                                                      | 1                           | 1                                     | 1                                                                            | 1                                                  | 0                                    | 0                                      | 7                    |
| Morales-Palermo <sup>2019</sup> | 1                              | 1                       | 0                      | 1                          | 1                    | 3                                                      | 0                           | 2                                     | 1                                                                            | 1                                                  | 1                                    | 1                                      | 13                   |
| Moreira <sup>2008</sup>         | 1                              | 0                       | 0                      | 1                          | 1                    | 0                                                      | 0                           | 2                                     | 1                                                                            | 1                                                  | 1                                    | 1                                      | 9                    |
| Nybo <sup>2010</sup>            | 0                              | 0                       | 0                      | 0                          | 1                    | 3                                                      | 1                           | 1                                     | 1                                                                            | 1                                                  | 1                                    | 0                                      | 9                    |
| Ramos <sup>2016</sup>           | 1                              | 1                       | 1                      | 1                          | 1                    | 2                                                      | 0                           | 1                                     | 1                                                                            | 1                                                  | 1                                    | 1                                      | 12                   |
| Ruffino <sup>2016</sup>         | 1                              | 1                       | 0                      | 1                          | 1                    | 2                                                      | 0                           | 2                                     | 1                                                                            | 1                                                  | 1                                    | 0                                      | 11                   |
| Sawyer <sup>2016</sup>          | 1                              | 0                       | 1                      | 1                          | 1                    | 1                                                      | 0                           | 2                                     | 1                                                                            | 1                                                  | 1                                    | 1                                      | 11                   |
| Shepherd <sup>2015</sup>        | 1                              | 0                       | 1                      | 1                          | 1                    | 1                                                      | 1                           | 2                                     | 1                                                                            | 1                                                  | 1                                    | 0                                      | 11                   |
| Thomas <sup>1985</sup>          | 1                              | 0                       | 0                      | 1                          | 1                    | 1                                                      | 0                           | 1                                     | 1                                                                            | 1                                                  | 1                                    | 1                                      | 8                    |
| Tjønnå <sup>2008</sup>          | 1                              | 0                       | 1                      | 0                          | 1                    | 2                                                      | 0                           | 2                                     | 1                                                                            | 1                                                  | 1                                    | 1                                      | 11                   |
| Vella <sup>2017</sup>           | 0                              | 0                       | 1                      | 1                          | 1                    | 3                                                      | 0                           | 2                                     | 1                                                                            | 1                                                  | 1                                    | 1                                      | 12                   |
| Winding <sup>2018</sup>         | 1                              | 1                       | 1                      | 0                          | 1                    | 2                                                      | 0                           | 2                                     | 1                                                                            | 1                                                  | 1                                    | 1                                      | 12                   |
| Winn <sup>2018</sup>            | 1                              | 0                       | 1                      | 1                          | 1                    | 3                                                      | 0                           | 2                                     | 1                                                                            | 1                                                  | 1                                    | 1                                      | 13                   |
| Zhang <sup>2015</sup>           | 0                              | 0                       | 0                      | 1                          | 1                    | 1                                                      | 0                           | 2                                     | 1                                                                            | 1                                                  | 1                                    | 1                                      | 9                    |
|                                 | 2                              | 2                       | 2                      | 2                          | 2                    | 2                                                      | 2                           | 2                                     | 2                                                                            | 2                                                  | 2                                    | 2                                      | 2                    |

Key: Total Out of 15 points.

Legend: <sup>a</sup>Blood lipid measurements automated. <sup>b</sup>All studies were awarded 1. <sup>c</sup>Three points possible—one point if adherence >85%, one point if adverse events reported, one point if exercise attendance is reported. <sup>d</sup>Two points possible—one point if primary outcomes reported, one point if all other outcomes reported. <sup>e</sup>MICTs treated as the control for this meta-analysis. <sup>f</sup>All studies were awarded 1 because activity monitoring was done.

Table [4] Study Lipid Assessment Reporting

| Study                           | Lipid Assessment Methodology                                                                                                                                                                                                                                                                                                                                                                                                                                                                                           |
|---------------------------------|------------------------------------------------------------------------------------------------------------------------------------------------------------------------------------------------------------------------------------------------------------------------------------------------------------------------------------------------------------------------------------------------------------------------------------------------------------------------------------------------------------------------|
| (Ciolac, et al. 2010)           | Total cholesterol, fractions, and triglycerides: standard methods analysis using a Dimension RXL Max automatic analyser (Dade Behring, Newark, DE, USA).                                                                                                                                                                                                                                                                                                                                                               |
| (Connolly, et al. 2017)         | Samples were analysed using an automatic analyser (Roche Modular P-module, Roche Diagnostics, Indianapolis, IN) for HDL-C (coefficient of variation (CV) 2.1%), total cholesterol (CV 2.3%) and triglycerides (CV 2.4%). LDL-C was derived using the Friedewald formula (Friedewald et al. 1972).                                                                                                                                                                                                                      |
| (Cuddy, Ramos and Dalleck 2019) | Samples were analysed via a Cholestech LDX System according to strict standardized operating procedures. The LDX Cholestech measured the total cholesterol, high density lipoprotein (HDL) cholesterol, low density lipoprotein (LDL) cholesterol, triglycerides, and blood glucose in the fingerstick blood. A daily optics check was performed on the LDX Cholestech analyzer used for the study.                                                                                                                    |
| (Fisher, et al. 2015)           | Total cholesterol, HDL-C, and triglycerides were measured using a SIRRUS analyzer (Stanbio Laboratory, Boerne, TX); LDL-C was calculated using the method of Friedewald et al. 1972.                                                                                                                                                                                                                                                                                                                                   |
| (Hwang, et al. 2016)            | Blood lipids were assessed using spectrophotometry.                                                                                                                                                                                                                                                                                                                                                                                                                                                                    |
| (Keating, et al. 2014)          | The whole blood sample was stored at 4°C for 2-3h prior to analysis by an accredited commercial laboratory (Douglass Hanly Moir Pty Ltd., Sydney, Australia). Analysis was performed on the same day as that of collection of lipids including triglycerides (TRG), total cholesterol (TC), high density lipoprotein cholesterol (HDL-C), and low density lipoprotein cholesterol (LDL-C).                                                                                                                             |
| (Kemmler, et al. 2014)          | Total cholesterol, LDL-cholesterol, HDL-cholesterol, triglycerides, (Olympus Diagnostica GmbH, Hamburg, Germany) were determined.                                                                                                                                                                                                                                                                                                                                                                                      |
| (Kong, et al. 2016)             | Serum lipids, including high-density lipoprotein cholesterol (HDL-C), low-density lipoprotein cholesterol (LDL-C), total cholesterol (TC) and total triglyceride (TG), were measured by using an automatic biochemical analyzer (Olympus AU400, Japan). The intra-assay coefficients of variation (CV) for blood lipid assays were all within 5%.                                                                                                                                                                      |
| (Lee, Hsu and Cheng 2016)       | Serum was analyzed for TG, TC, HDL-C, and LDL-C; the inter-assay CV values were 1.8%, 1.8%, 2.0%, and 2.1%, respectively.                                                                                                                                                                                                                                                                                                                                                                                              |
| Lira, et al. 2019)              | The concentrations of TRG, TC, and HDL-c were determined by a colorimetric method according to specific kits (Labtest, Brazil). In addition, the non-HDL cholesterol (nHDL-c) was calculated by subtracting total cholesterol to HDL-c concentrations. All results were adjusted for individual changes in plasma volume.                                                                                                                                                                                              |
| (Maillard, et al. 2016)         | Plasma concentrations of total cholesterol (TC), high-density lipoprotein cholesterol (HDL-C) and triglycerides (TG) were measured (Synchron Clinical System UniCel DxC analyzer, Beckman Coulter, Brea, CA, USA), with a cholesterol oxidase method for TC (CHOL reagent), a direct homogeneous method for HDL-C (HDL reagent) and a lipase/glycerol kinase method for TG (GPO reagent). The low-density lipoprotein (LDL) fraction was indirectly quantified using the equation described by Friedewald et al. 1972. |
| (Matsuo, et al. 2015)           | Automated laboratory methods were used to measure serum lipids. LDL cholesterol was calculated according to Friedewald's formula. The inter- and intra-assay CV were <5% for all blood parameters.                                                                                                                                                                                                                                                                                                                     |
| (Mohr, et al. 2014)             | Serum analyzed by an automatic analyzer (Cobas Fara, Roche, France) using enzymatic kits (Roche Diagnostics, Germany) for determination of total cholesterol, LDL-cholesterol, HDL-cholesterol, and triglyceride levels.                                                                                                                                                                                                                                                                                               |
| (Morales-Palomo, et al. 2019)   | High-density lipoprotein cholesterol (HDL-c) using accelerator selective detergent method (iCV, 1.7%-2.9%). Blood TG with glycerol-3-phosphate oxidize method (iCV, 0.8%-1.7%). Total serum cholesterol by an enzymatic method with a single aqueous reagent (iCV, 1.1%-1.4%). Low-density lipoprotein-cholesterol (LDL-c) was calculated as proposed by Friedewald. All of the above analyses were run in an automated Mindray BS 400 Chemistry Analyzer (Mindray Medical Instrumentation, Shenzhen, China).          |
| (Moreira, et al. 2008)          | Total cholesterol and triglyceride were measured by 50-µL blood samples drawn from the earlobe in heparinized capillary tubes and the blood deposited in specific reagent strips for each determination performed in the Accutrend GCT portable instrument (Roche).                                                                                                                                                                                                                                                    |
| (Nybo, et al. 2010)             | Plasma fatty acid, HDL cholesterol, and plasma triacylglycerol concentrations were measured by commercial kits (Wako Chemicals, Neuss, Germany) on a Hitachi autoanalyzer (Roche Diagnostic, Basel, Switzerland). The analytical variations (CV) for these measures were reported to be less than 1.5%. LDL cholesterol was calculated in accordance with the Friedewald-Levy-Fredrickson equation as total cholesterol minus HDL cholesterol and one-fifth of total plasma triacylglycerol.                           |
| (Ramos, et al. 2016)            | The fasting lipid profile (triglyceride, total cholesterol (TC), HDL cholesterol (HDL-C), and LDL cholesterol (LDL-C)) levels were measured via a finger-prick blood sample analyzed using a Cholestech LDX system.                                                                                                                                                                                                                                                                                                    |
| (Ruffino, et al. 2017)          | Baseline plasma samples were analysed for triglycerides, low-density                                                                                                                                                                                                                                                                                                                                                                                                                                                   |

|                                  |                                                                                                                                                                                                                                                                                                                                                                                                                                                                                                                                                                                                                                                                                                                                                                                              |
|----------------------------------|----------------------------------------------------------------------------------------------------------------------------------------------------------------------------------------------------------------------------------------------------------------------------------------------------------------------------------------------------------------------------------------------------------------------------------------------------------------------------------------------------------------------------------------------------------------------------------------------------------------------------------------------------------------------------------------------------------------------------------------------------------------------------------------------|
|                                  | lipoprotein, and high-density lipoprotein (Randox RX Daytona Co.).                                                                                                                                                                                                                                                                                                                                                                                                                                                                                                                                                                                                                                                                                                                           |
| (Sawyer, et al. 2016)            | Total cholesterol, high-density lipoprotein cholesterol (HDL-c), low-density lipoprotein cholesterol (LDL-c), triglycerides, and glucose were measured in plasma with an automated chemistry analyzer (Cobas C111; Roche Diagnostics, Indianapolis, IN) using colorimetric enzymatic reagents. Measured intra-assay coefficient of variation (CV) values were 1.4% for total cholesterol, 0.9% for HDL-C, 1.1% for LDL-C, and 1.6% for triglycerides.                                                                                                                                                                                                                                                                                                                                        |
| (Shepherd, et al. 2015)          | An ILab-600 semi-automatic spectrophotometric analyser was used to determine fasting serum non-esterified fatty acid (NEFA), triglyceride (TG), total cholesterol (TC), LDL-cholesterol (LDL-C) and HDL-cholesterol (HDL-C) concentrations, in combination with the appropriate assay kit (all obtained from Instrumentation Laboratory Ltd UK, Warrington, UK, except for the NEFA assay, which was obtained from Randox, London, UK).                                                                                                                                                                                                                                                                                                                                                      |
| (Thomas, et al. 1985)            | HDL-C and TC were analyzed immediately according to the microprocedure of Bonzert and Brewer (1977). This technique requires separation of HDL using phosphotungstate MgCl <sub>2</sub> , ultracentrifugation with a Beckman Airfuge, and an enzymic analysis of TC using a Beckman Cholesterol Analyzer with oxygen electrode. Within assay reliability was assessed by calculating the mean coefficient of variation from duplicate or triplicate samples run during the study. The mean within coefficient of variation for TC = 2.1% and HDL-C = 1.5%. Between assay reliability was assessed by analyzing standards from a stored plasma pool (-70°C) on separate days. The coefficient of variation for TC = 3.6% and HDL-C = 2.5%.                                                    |
| (Tjønnna, et al. 2008)           | All blood analyses were performed with standard local procedures.                                                                                                                                                                                                                                                                                                                                                                                                                                                                                                                                                                                                                                                                                                                            |
| (Vella, Taylor and Drummer 2017) | High-density lipoprotein (HDL), low-density lipoprotein (LDL), total cholesterol, and triglycerides were measured using a Dimension RxL Max Integrated Chemistry System (Siemens, Erlangen, Germany) HDL cholesterol was assessed using the polyethylene glycol direct method with a minimum sensitivity of 0.3 mmol/L and an intra-assay CV of 0.9%. LDL cholesterol was measured using the direct method with a minimum sensitivity of 0.13 mmol/L and an intra-assay CV of 1.4%. Total cholesterol was measured via cholesterol oxidase, esterase, and peroxidase, and had a minimum sensitivity of 0.39 mmol/L and an intra-assay CV of 1.1%. Triglycerides were measured using the enzymatic endpoint method and had a minimum sensitivity of 0.6 mmol/L and an intra-assay CV of 1.2%. |
| (Winding, et al. 2018)           | Baseline blood samples were collected for determination of plasma lipids.                                                                                                                                                                                                                                                                                                                                                                                                                                                                                                                                                                                                                                                                                                                    |
| (Winn, et al. 2018)              | Serum lipids and aminotransferases (e.g. cholesterol, TG, HDL-C, and LDL-C) were determined by a commercial laboratory (Boyce and Bynum Pathology Laboratories, Columbia, MO, USA).                                                                                                                                                                                                                                                                                                                                                                                                                                                                                                                                                                                                          |
| (Zhang, et al. 2015)             | Commercially available kits (Shanghai Kehua Bio-engineering, China) were used with an automatic chemistry analyser (7180, HITACHI, Japan) to determine triglycerides (TG) and total cholesterol (TC). The inter- and intra-coefficients of variance for the measures were as follows: TG (5%, 6%) and TC (4%, 3%).                                                                                                                                                                                                                                                                                                                                                                                                                                                                           |

Funnel Plots:  
Figure [2] Total Cholesterol

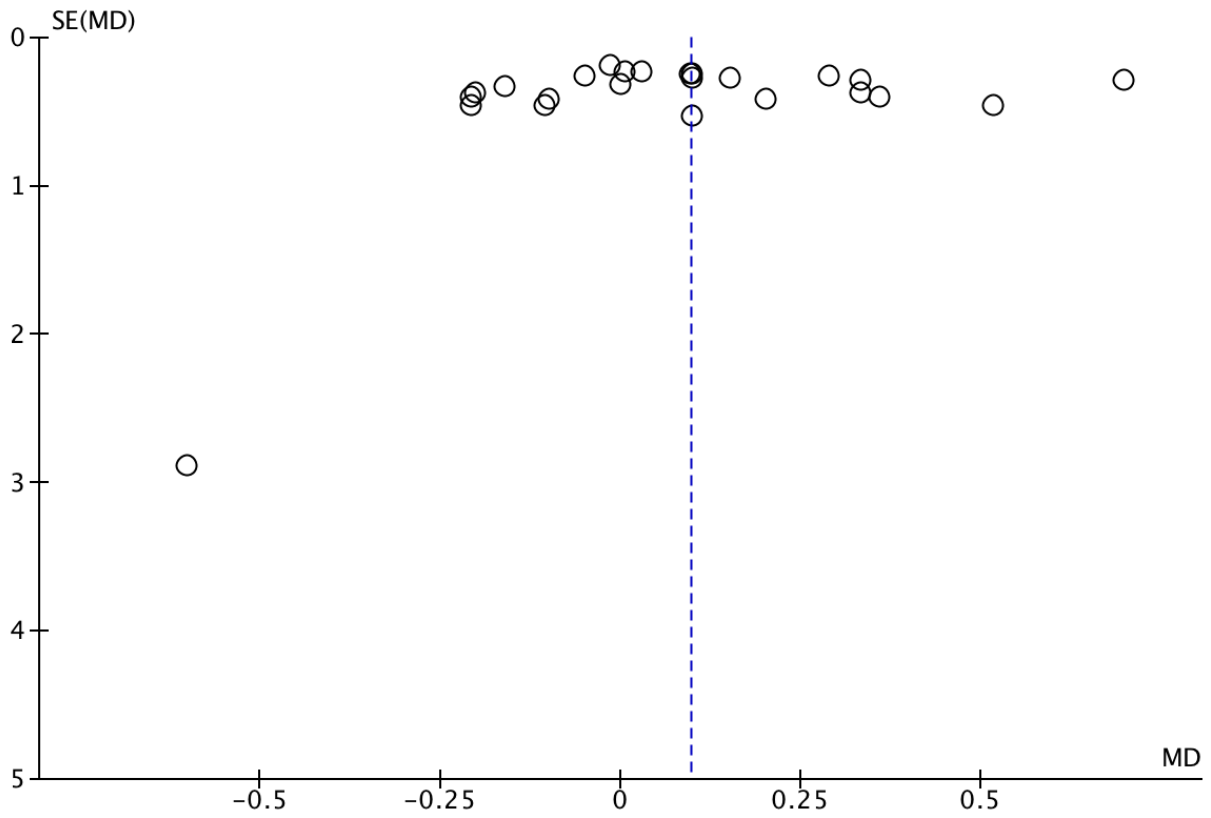

Figure [3] Triglycerides

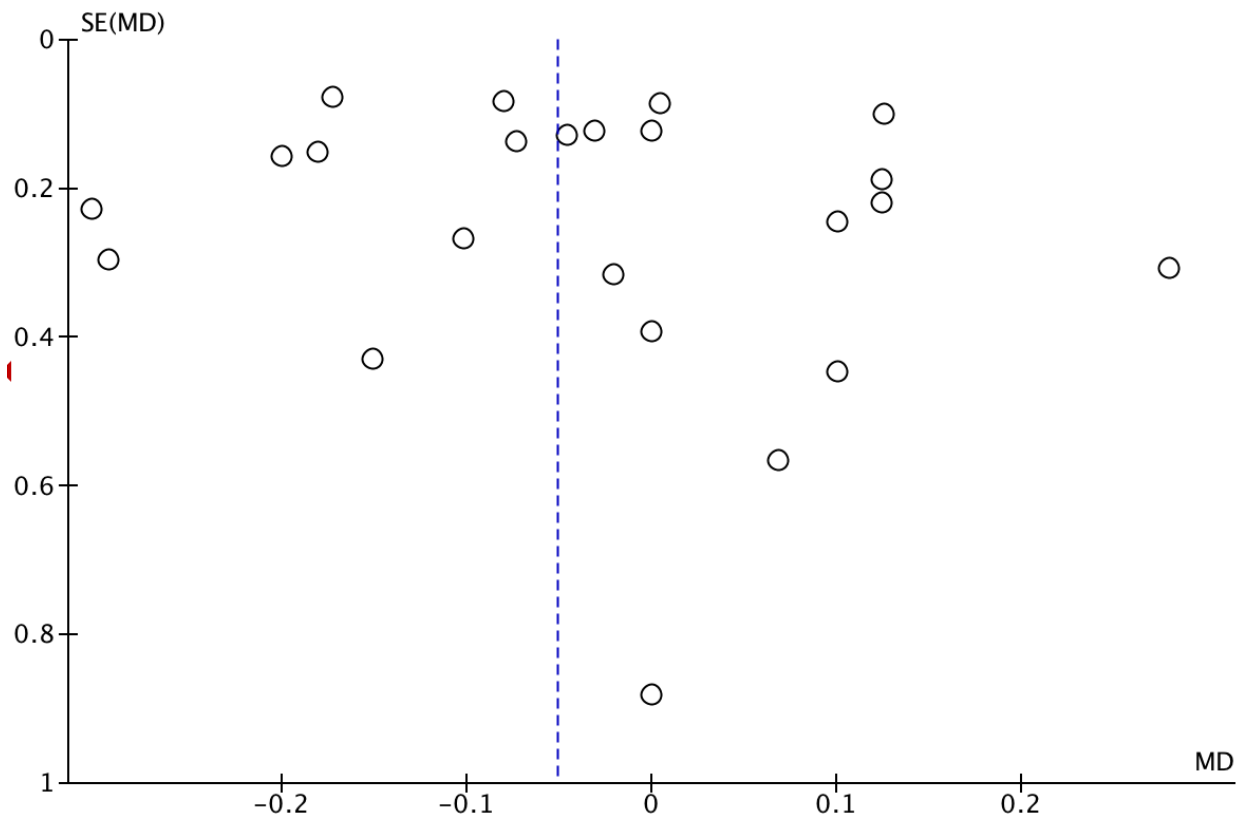



Figure [4] High-density Lipoprotein Cholesterol

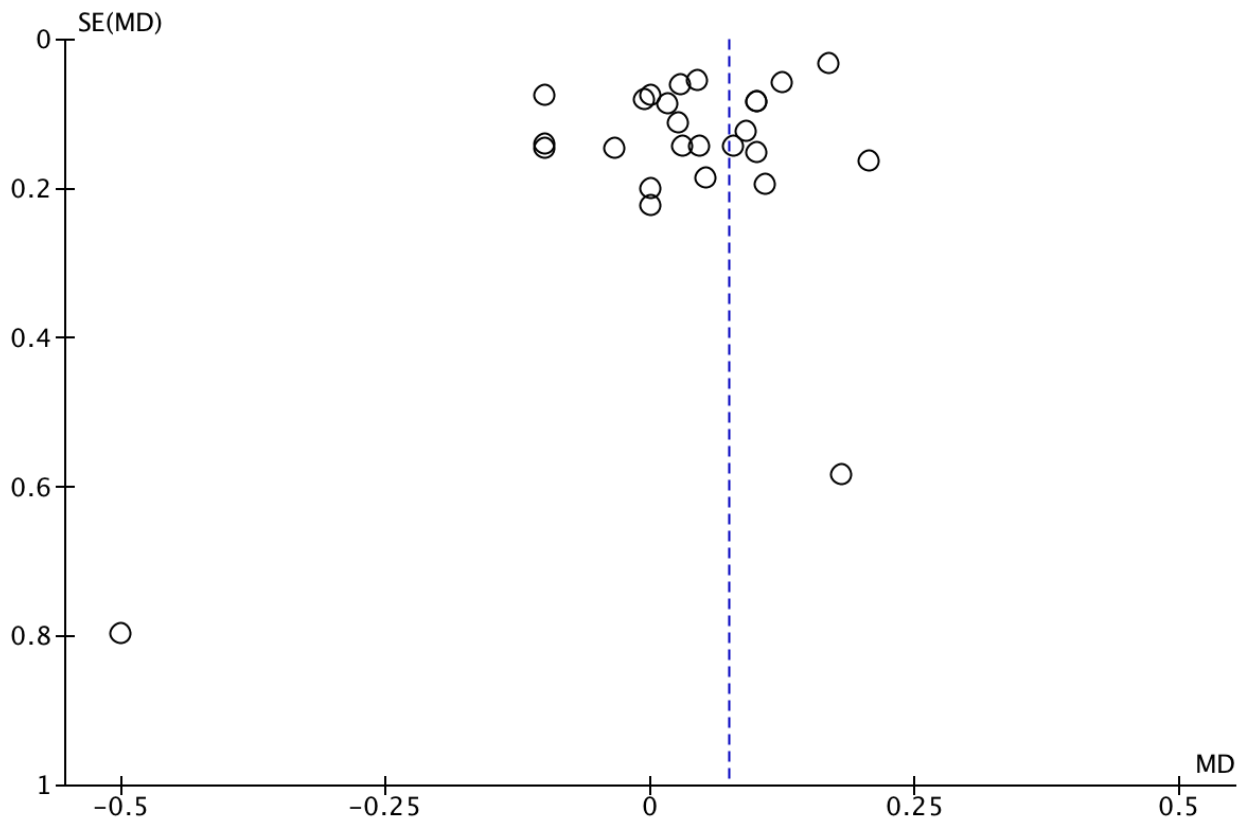

Figure [5] Low-density Lipoprotein Cholesterol

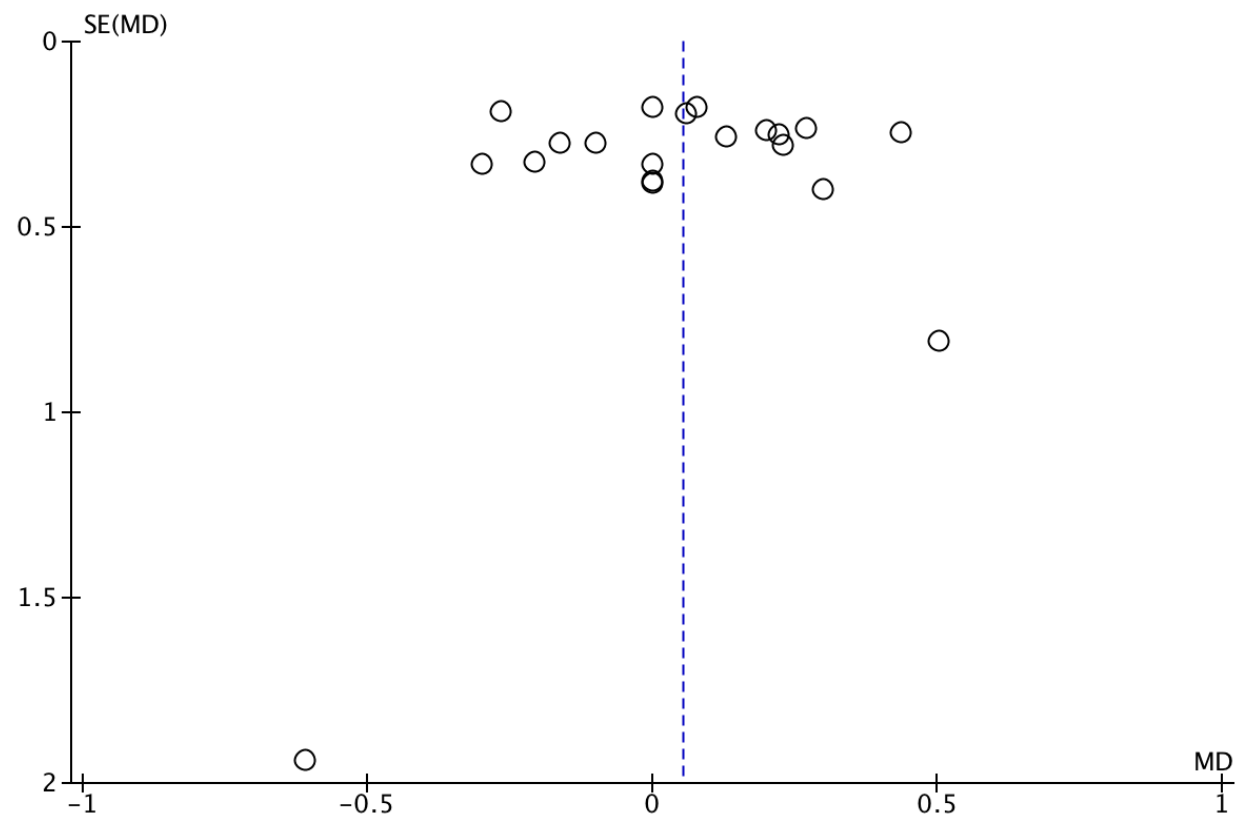

Figure [6] TC/HDL Ratio

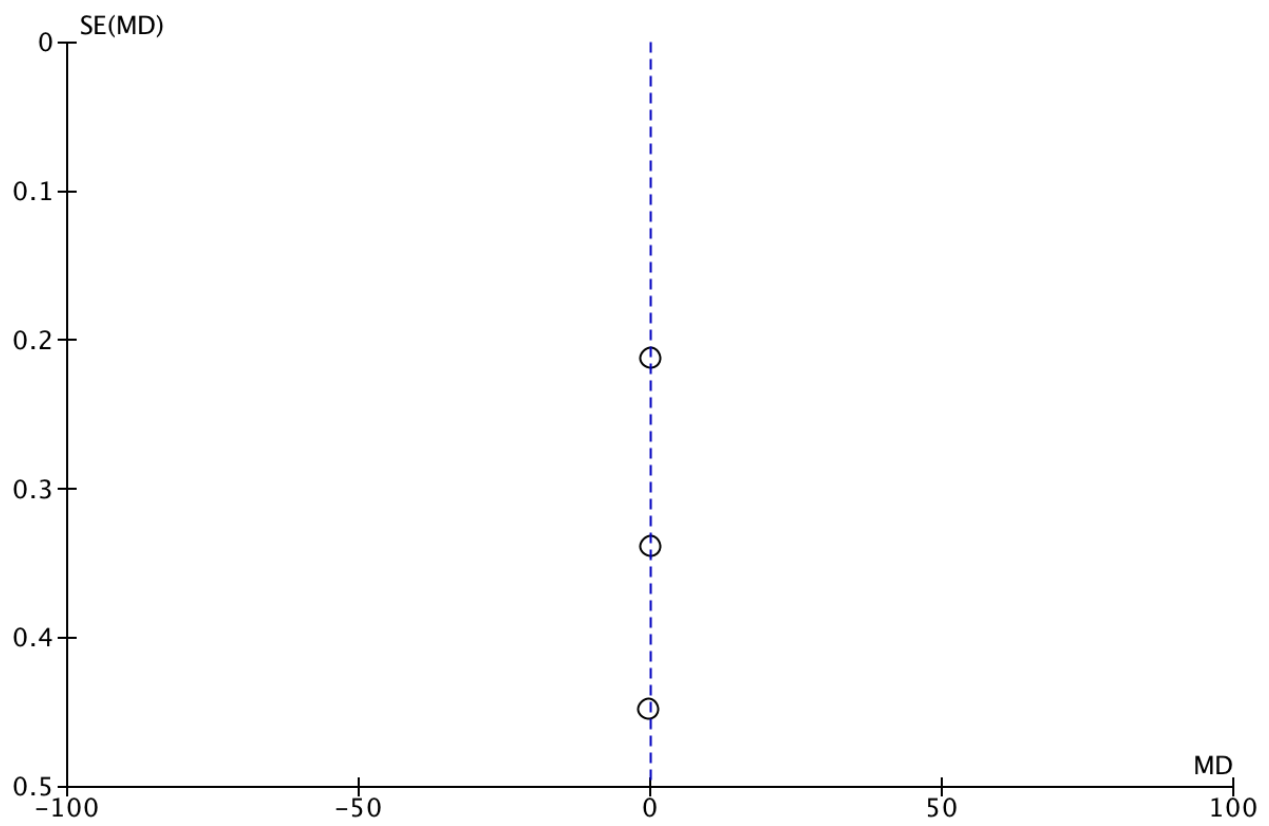

Supplement: bmjsem-2019-000647supp001.pdf [file bmjsem-2019-000647supp001.pdf]
